# Supplementary material for: N-[4-(N,N,N-Trimethylammonium)Benzyl]Chitosan Chloride as a Gene Carrier: The Influence of Polyplex Composition and Cell Type
Source: MDPI journal article supplement (doi:10.3390/ma14092467), 2021-05-10
Supplement: s1 [file s1]

Article

# ***N*-[4-(*N,N,N*-Trimethylammonium)Benzyl]Chitosan Chloride as a Gene Carrier: The Influence of Polyplex Composition and Cell Type**

Sergei V. Raik <sup>1</sup>, Tatiana V. Mashel <sup>2</sup>, Albert R. Muslimov <sup>3,4,5</sup>, Olga S. Epifanovskaya <sup>3</sup>, Mikhail A. Trofimov <sup>4</sup>, Daria N. Poshina <sup>1</sup>, Kirill V. Lepik <sup>3</sup> and Yury A. Skorik <sup>1,\*</sup>

<sup>1</sup> Institute of Macromolecular Compounds of the Russian Academy of Sciences, Bolshoi pr. VO 31, 199004 Saint Petersburg, Russia; raiksv@gmail.com (S.V.R.); poschin@yandex.ru (D.N.P.)

<sup>2</sup> Department of Applied Optics, ITMO University, Kronverkskiy pr. 49, 197101 Saint Petersburg, Russia; t.v.mashel@gmail.com

<sup>3</sup> R.M. Gorbacheva Research Institute of Pediatric Oncology, Hematology and Transplantation, Pavlov University, Lva Tolstogo 6/8, 197022 Saint Petersburg, Russia; albert.r.muslimov@gmail.com (A.R.M.); epif-olga@rambler.ru (O.A.E.); lepikkv@gmail.com (K.V.L.)

<sup>4</sup> Renewable Energy Laboratory, St. Petersburg Academic University, Khlopina 8/3 lit. A, 194021 Saint Petersburg, Russia; mihail.trofimov@pharminnotech.com

<sup>5</sup> "QR.bio", Voronezhskaya 5 lit. A, 191119 Saint Petersburg, Russia; albert.r.muslimov@gmail.com

\* Correspondence: yury\_skorik@mail.ru

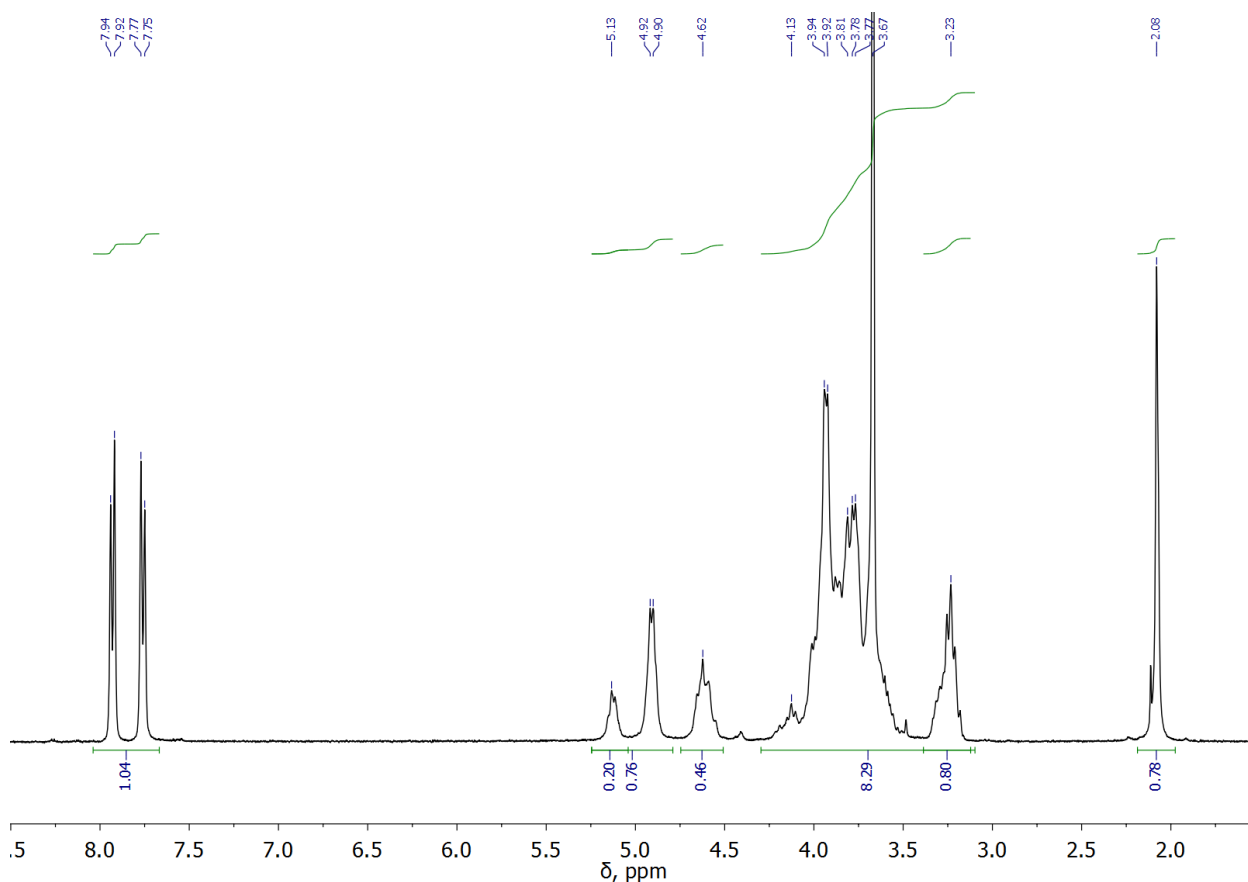

**Figure S1.** <sup>1</sup>H NMR spectrum of TMAB-CS37-26 (400 MHz, 343 K).

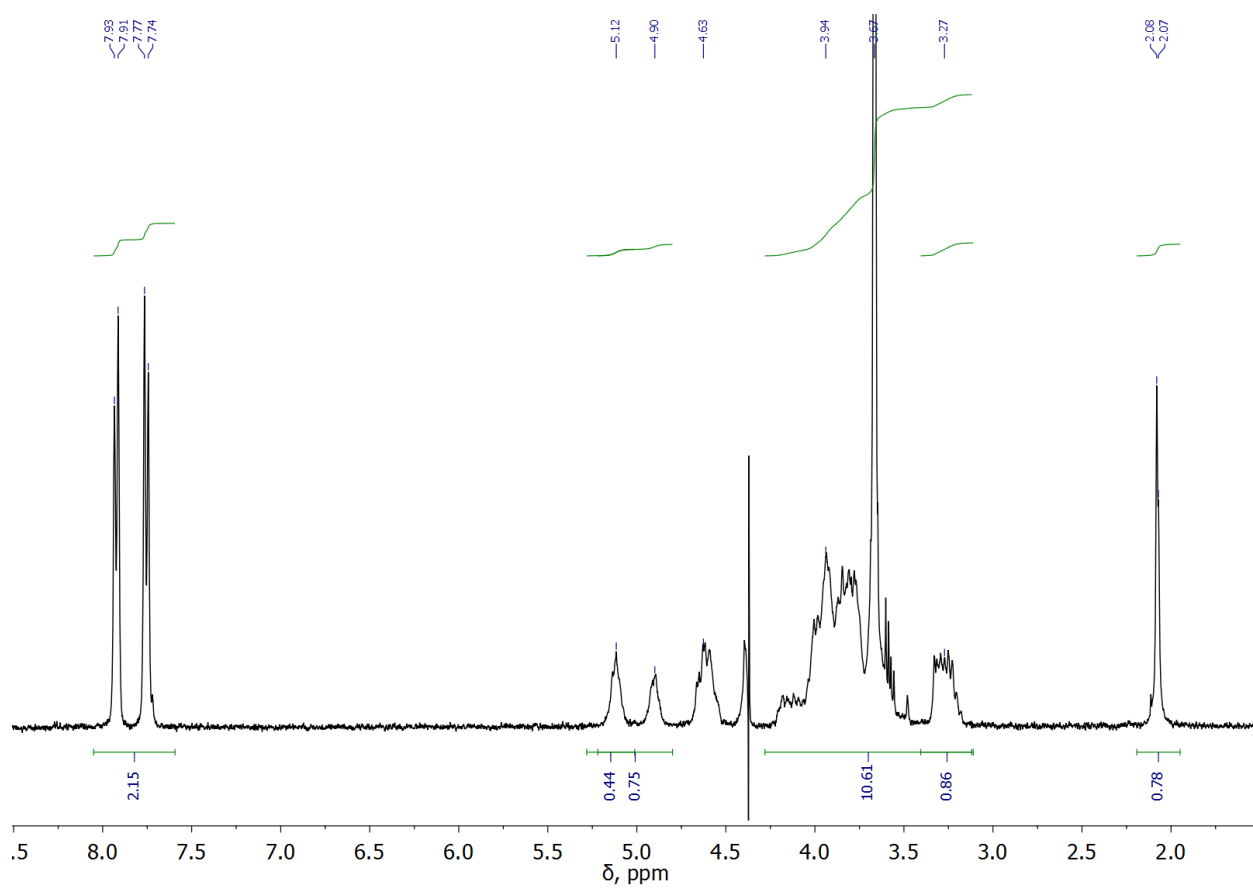

**Figure S2.**  $^1\text{H}$  NMR spectrum of TMAB-CS37-54 (400 MHz, 343 K).

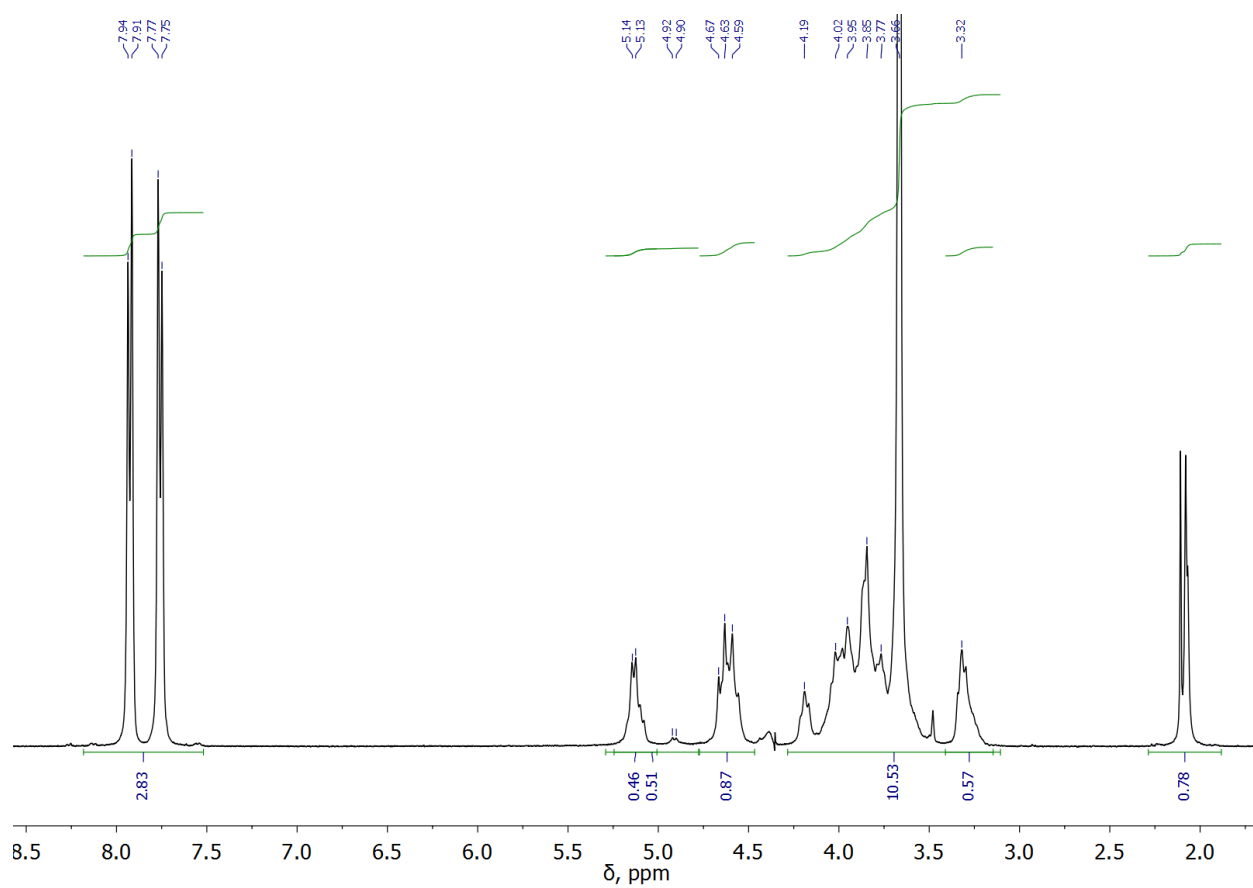

**Figure S3.**  $^1\text{H}$  NMR spectrum of TMAB-CS37-71 (400 MHz, 343 K).

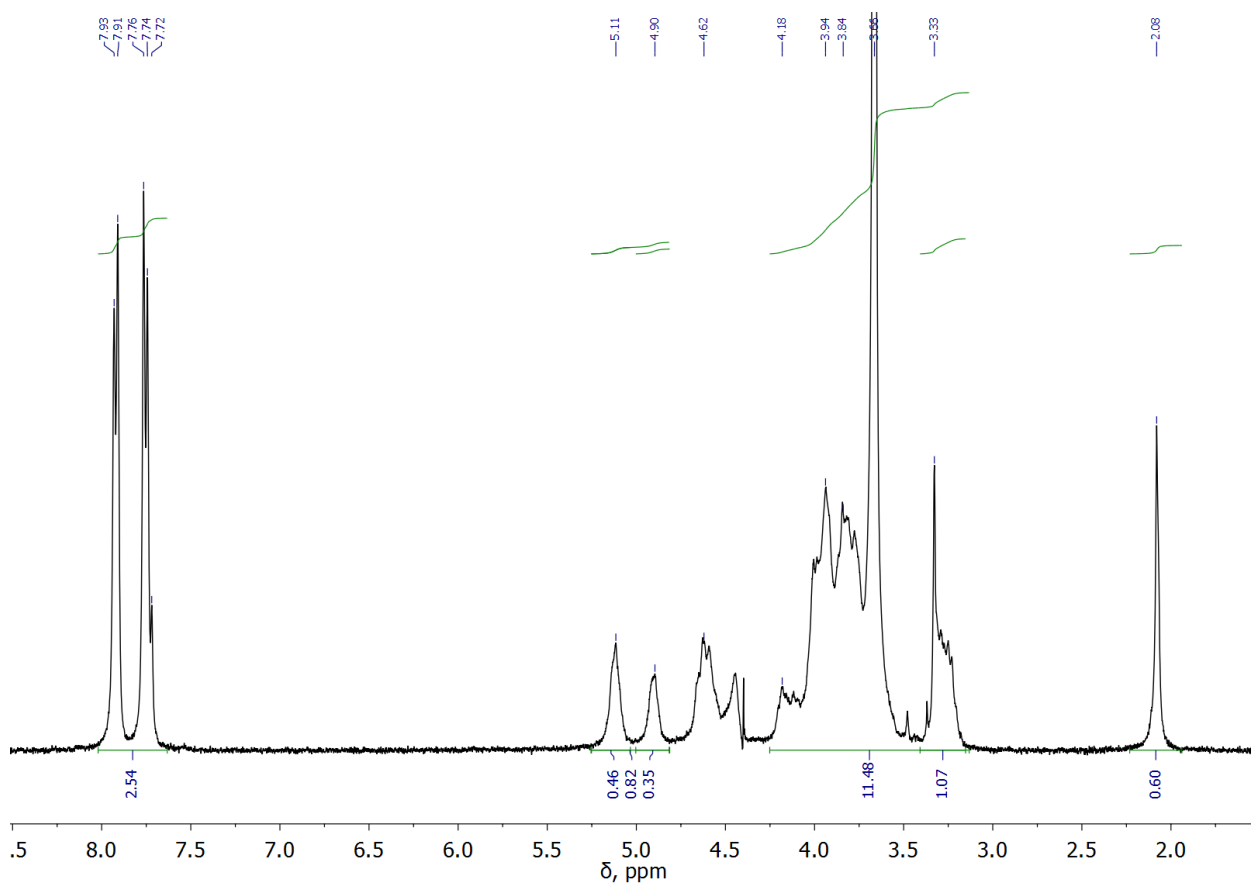

**Figure S4.**  $^1\text{H}$  NMR spectrum of TMAB-CS135-64 (400 MHz, 343 K).

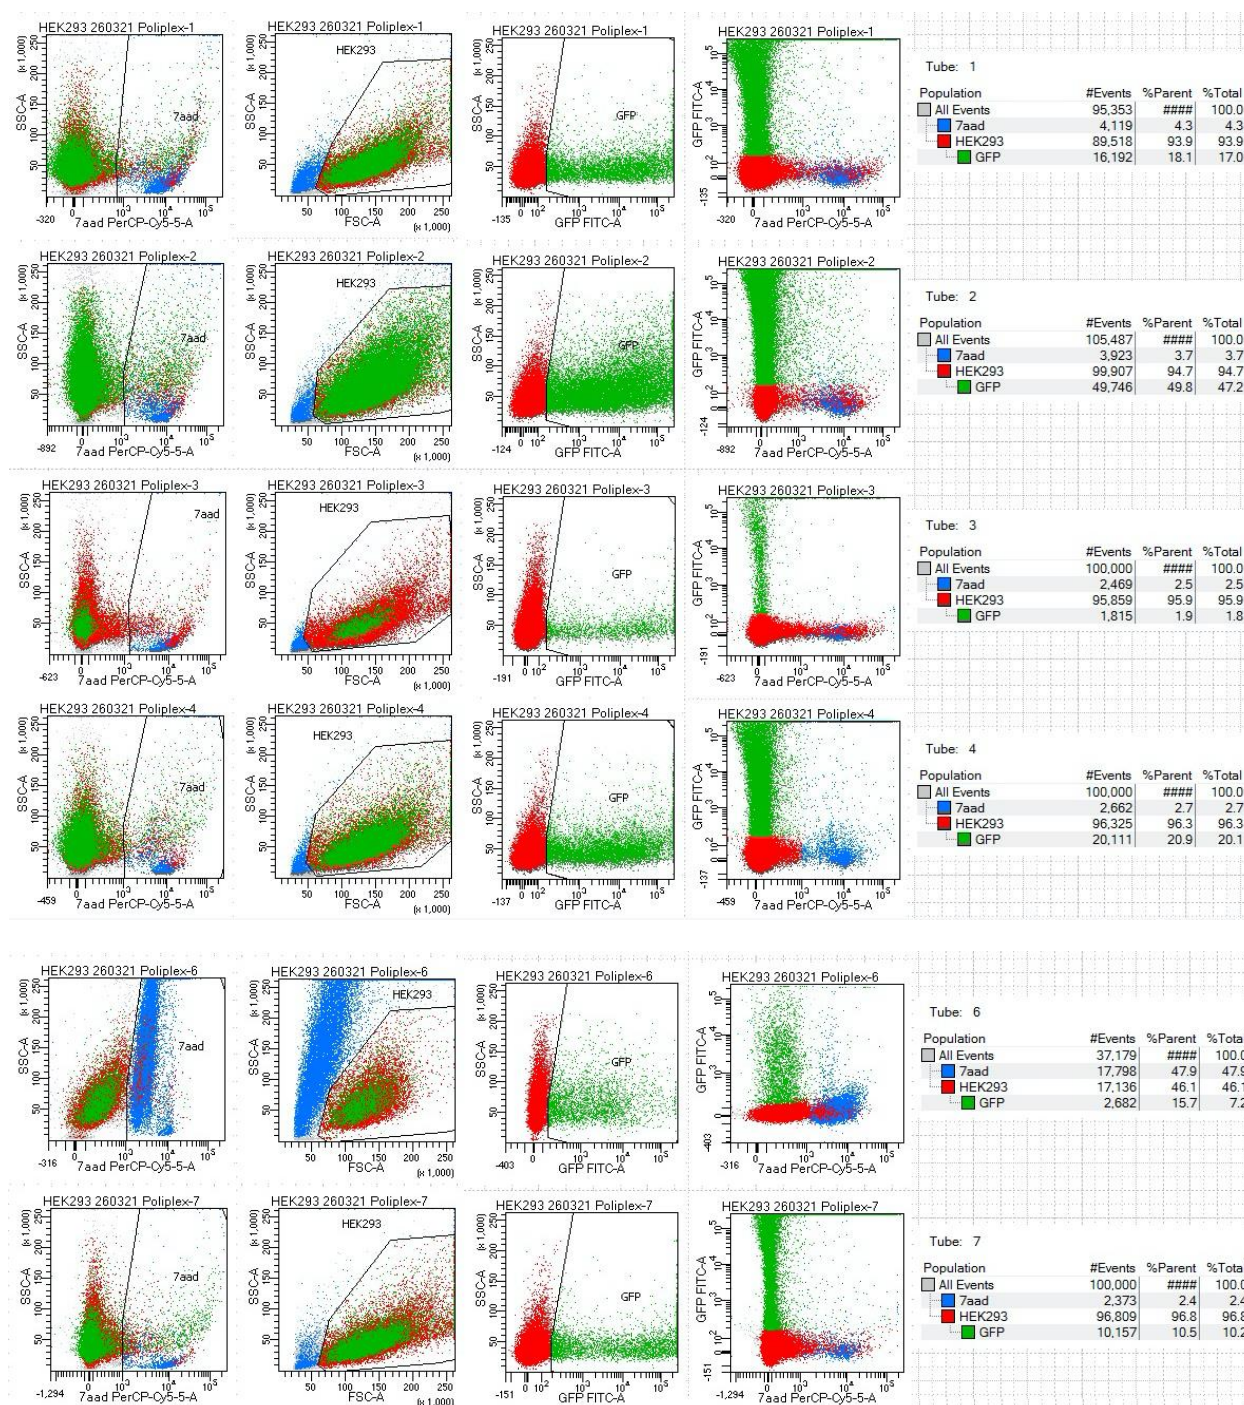

**Figure S5.** Flow cytometry data for HEK 293T transfection (No. 1-6 from Table 4 in the same order).



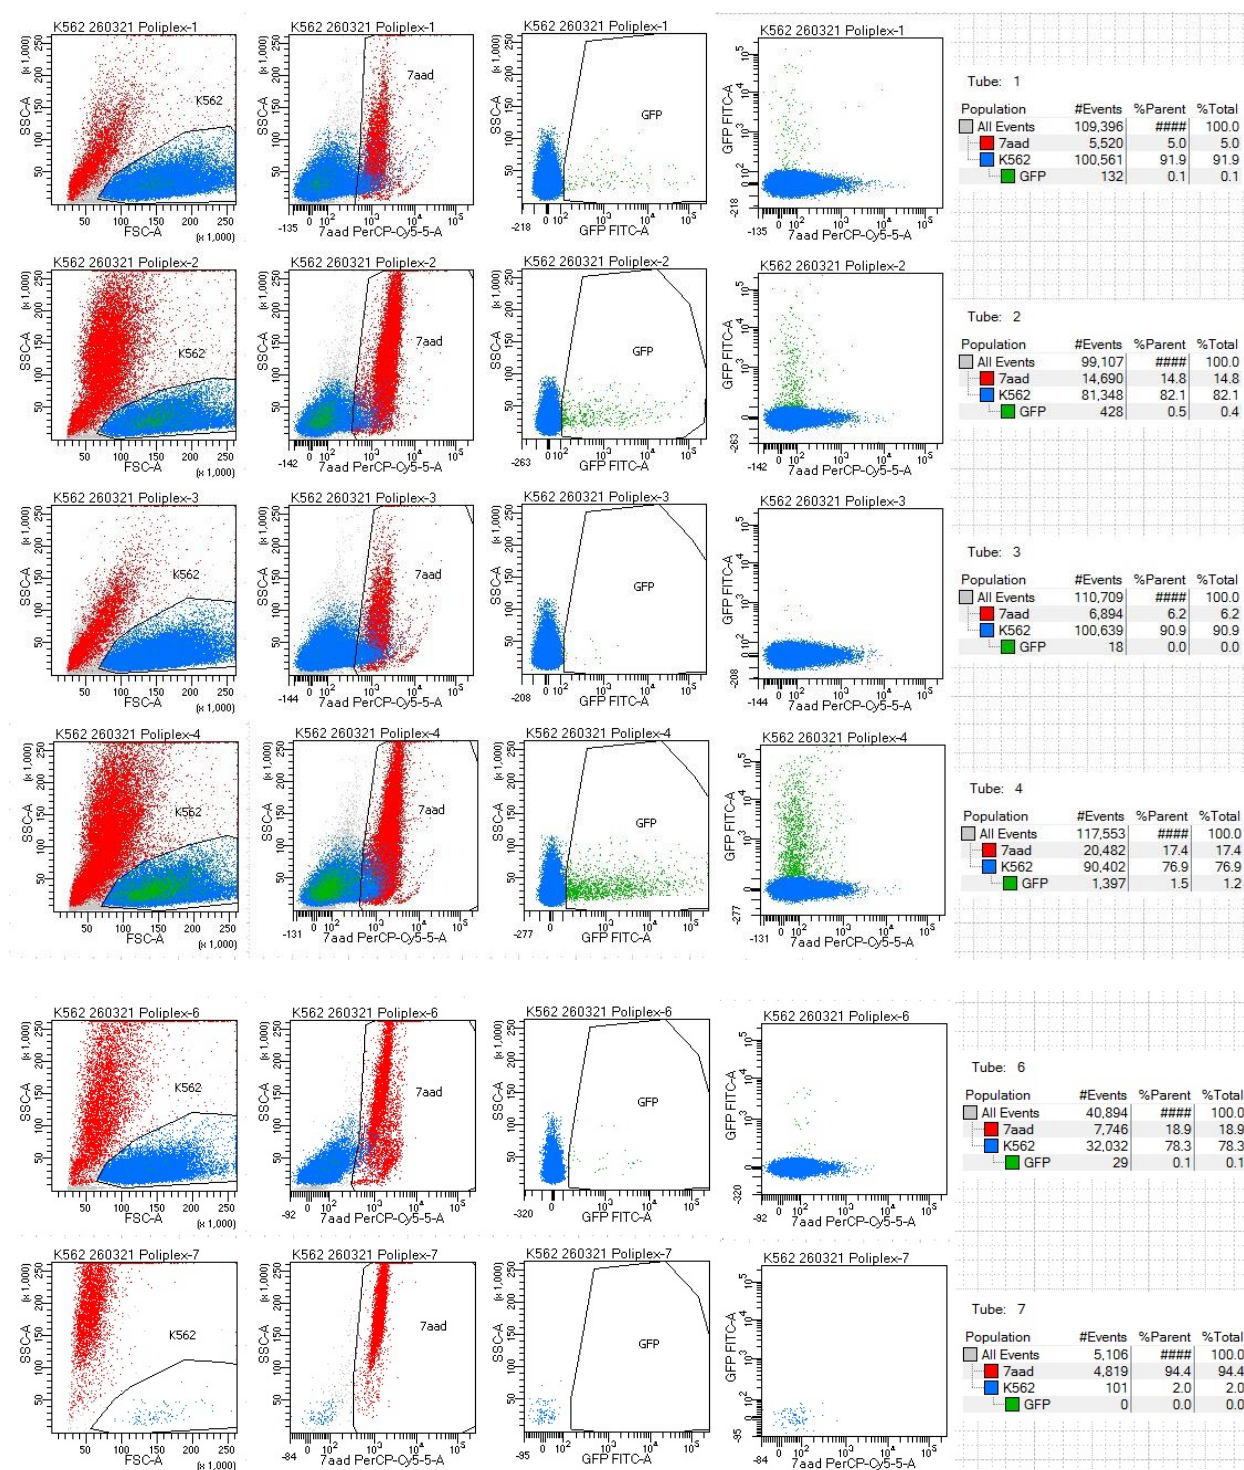

**Figure S6.** Flow cytometry data for K562 transfection (No. 1-6 from Table 4 in the same order).
